# Supplementary material
Source: Springer Nature journal article supplement (https://www.springermedizin.de/resource/supplementary/13046_2013_729_MOESM1_ESM.pdf/9662820)

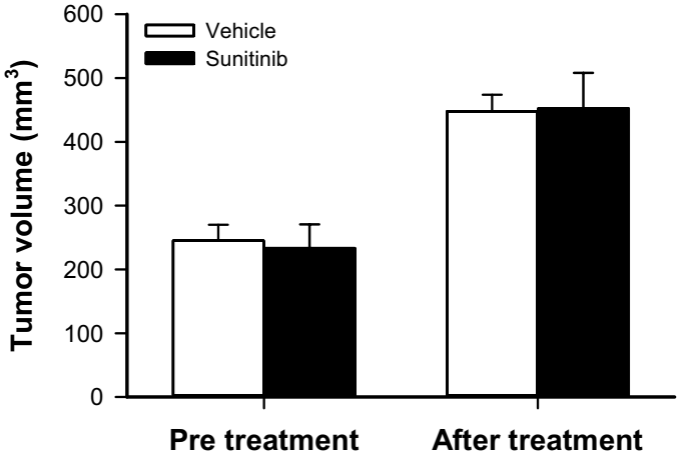

Supplement: MOESM1 [file 9662820]
